# Supplementary material for: Determinants of workers’ well-being during the COVID-19 outbreak: An exploratory study
Source: Springer Nature journal article supplement (doi:10.1007/s12144-021-02408-w), 2021-10-22
Supplement: MOESM1 [file 12144_2021_2408_MOESM1_ESM.docx]

Supplementary Materials 1

Determinants of Workers’ Well-Being During the COVID-19 Outbreak

An Exploratory Study

**Measures used in the study**

Below we present in detail the instruments used in this study and the tables referenced in the main text of the manuscript. We provide a description of each scale along with its psychometric properties. The items content of each scale is presented in the respective tables (see Table S1-S7). The reliability of each scale was estimated using McDonald’s ω (McDonald, 1999), following suggestions by Trizano-Hermosilla and Alvarado (2016).

**Psychological Well-Being**. We used the 18-item version (see Table S1) of the Psychological Well-Being scale (PWB; Ryff & Keyes, 1995; Ryff et al., 2010) to assess the 6 dimensions of Ryff’s model: Self-acceptance (ω = .46), Personal growth (ω = .59), Purpose in life (ω = .31), Environmental mastery (ω = .54), Autonomy (ω = .44), and Positive relations with others (ω = .61). Participants indicated their level of agreement to each item using a 7-point scale ranging from 1 (= strongly disagree) to 7 (= strongly agree).

**Life Satisfaction**. We measured life satisfaction using the item: “*In this moment, how satisfied are you with your life?*” (Cheung & Lucas, 2014). The response format was a 5-point scale ranging from 1 (= completely unsatisfied) to 5 (= completely satisfied). Mean and standard deviation were *M* = 3.99 and *SD* = .98, respectively.

**Positive and Negative Affect**. We assessed Positive and Negative Affect (Table S2) with the Italian version (Terraciano, McCrae, & Costa, 2003) of the Positive and Negative Affect Schedule – State Version (PANAS; Watson, Clark, & Tellegen, 1988). Positive Affect and Negative Affect scales are composed of 10 item each referring to mood and emotional states (i.e. “Determined” or “Enthusiastic” for Positive Affect, “Afraid” or “Upset” for Negative Affect). Participants were asked to indicate the degree to which they felt each emotional state in the week before completing the questionnaire, using a 5-point scale ranging from 1 (= not at all) to 5 (= very much). The ω coefficients were ω = .81 for Positive Affect and ω = .84 for Negative Affect.

**Big Five**. Personality traits (Table S3) were assessed with the Italian version (Chiorri, Bracco, Piccinno, Modafferi, & Battini, 2015) of the Ten Item Personality Inventory (TIPI; Gosling, Rentfrow, & Swann, 2003). The TIPI consists of adjectives and descriptors taken from other well-established Big Five instruments. The common stem is ‘I see myself as:’, and each item include two adjectives or descriptors (e.g. ‘Extraverted, enthusiastic’ or ‘Anxious, easily upset’) to which participants have to indicate their level of agreement, using a 7-point scale ranging from 1 (= strongly disagree) to 7 (= strongly agree). The ωcoefficients were ω = .42 for conscientiousness and ω = .57 for neuroticism.

**Dark Triad**. We measured psychopathy (see Table S4) with 4 items from the Italian version (Schimmenti et al., 2019) of the Dark Triad Dirty Dozen scale (DTDD; Jonason & Webster, 2010). The response format was a 5-point scale ranging from 1 (= strongly disagree) to 5 (= strongly agree), and the ωcoefficients was ω = .74.

**Positivity**. We measured Positivity (Table S5) with the Positivity Scale by Caprara and colleagues (2012). The response format was a 5-point scale ranging from 1 (= strongly disagree) to 5 (= strongly agree), and the ωcoefficients was ω = .78.

**Job Insecurity**. We measured Job Insecurity (Table S6) using 7 items drawn by the instrument proposed by Hellgren, Sverke, & Isaksson, (1999), and by Vander Elst, De Witte, & De Cuyper, (2014). The response format was a 5-point scale ranging from 1 (= strongly disagree) to 5 (= strongly agree), and the ωcoefficients was ω = .91.

**Generalized social trust**. According to the OECD (Gonzales & Smith, 2017), ‘trust in known others’, ‘trust in unknown others’ and trust in Government are three of the most important components of generalized social trust. We asked the participant to indicate how much trust they had in a number of groups and institutions, and they rated each item using a 5-point scale ranging from 1 (= no trust at all) to 5 (= complete trust). As presented in Table S7, items for trust in known others referred to family, friends, neighborhood, and colleagues. For trust in unknown others, we used items referring to unknown people from the same country of the participants and unknown people from different countries. Finally, trust in Government was measured by means of 4 items referring to the Italian Government, the Italian Prime Minister Giuseppe Conte, the President of the Italian Republic Sergio Mattarella and the European Union. The ωcoefficients were ω = .66 for trust in known others, ω = .90 for trust in unknown others and ω = .83 for trust in Government.

Table S1. Psychometric Properties of the Psychological Well-Being Scale.

| Item | Text | | *M* | *SD* | *rtt* |
| --- | --- | --- | --- | --- | --- |
| *Self-acceptance* | | | 4.28 | .73 |  |
| PWB_1 | | I like most parts of my personality. | 3.67 | .98 | .41 |
| PWB_2 | | When I look at the story of my life, I am pleased with how things have turned out so far. | 3.79 | 1.00 | .27 |
| PWB_5 | | In many ways I feel disappointed about my achievements in life. | 5.36 | 1.47 | .16 |
|  | | |  |  |  |
| *Personal growth* | | | 4.44 | .82 |  |
| PWB_11 | | For me, life has been a continuous process of learning, changing, and growth. | 4.22 | .81 | .62 |
| PWB_12 | | I think it is important to have new experiences that challenge how I think about myself and the world | 4.05 | .85 | .57 |
| PWB_14 | | I gave up trying to make big improvements or changes in my life a long time ago | 5.05 | 1.67 | .33 |
|  | | |  |  |  |
| *Purpose in life* | | | 4.56 | .92 |  |
| PWB_3 | | Some people wander aimlessly through life, but I am not one of them. | 3.88 | 1.05 | .25 |
| PWB_7 | | I live life one day at a time and don't really think about the future. | 4.99 | 1.62 | .35 |
| PWB_10 | | I sometimes feel as if I've done all there is to do in life. | 4.80 | 1.65 | .17 |
|  | | |  |  |  |
| *Environmental mastery* | | | 4.02 | .80 |  |
| PWB_4 | | The demands of everyday life often get me down. | 4.73 | 1.56 | .27 |
| PWB_8 | | In general, I feel I am in charge of the situation in which I live. | 3.54 | 1.09 | .31 |
| PWB_9 | | I am good at managing the responsibilities of daily life. | 3.78 | .91 | 57 |
|  | |  |  |  |  |
| *Autonomy* | | | 4.17 | .82 |  |
| PWB_15 | | I tend to be influenced by people with strong opinions | 4.95 | 1.62 | .26 |
| PWB_17 | | I have confidence in my own opinions, even if they are different from the way most other people think. | 3.71 | .97 | .47 |
| PWB_18 | | I judge myself by what I think is important, not by the values of what others think is important. | 3.84 | .97 | .45 |
|  | |  |  |  |  |
| *Positive relations* | | | 4.85 | 1.01 |  |
| PWB_6 | | Maintaining close relationships has been difficult and frustrating for me. | 5.50 | 1.54 | .63 |
| PWB_13 | | People would describe me as a giving person, willing to share my time with others. | 3.72 | .94 | .29 |
| PWB_16 | | I have not experienced many warm and trusting relationships with others. | 5.33 | 1.63 | .52 |

*Note*. *M* = mean; *SD* = standard deviation; *rtt* = item-total scale-score-corrected correlation coefficient; (R) = item reverse.

Table S2. Psychometric Properties of the Positive and Negative Affect Schedule – State Version.

| Item | Text | *M* | *SD* | *rtt* |
| --- | --- | --- | --- | --- |
| *Positive Affect* | | 3.50 | .62 |  |
| PANAS_1 | Interested | 3.97 | .76 | .47 |
| PANAS_3 | Excited | 2.69 | 1.16 | .47 |
| PANAS_5 | Strong | 3.51 | .96 | .50 |
| PANAS_7 | Scared | 3.23 | 1.13 | .66 |
| PANAS_9 | Enthusiastic | 3.29 | 1.18 | .47 |
| PANAS_11 | Irritable | 3.78 | .97 | .48 |
| PANAS_13 | Ashamed | 3.06 | 1.14 | .59 |
| PANAS_15 | Nervous | 3.84 | .95 | .67 |
| PANAS_17 | Attentive | 3.91 | .90 | .57 |
| PANAS_19 | Active | 3.76 | .97 | .62 |
|  |  |  |  |  |
| *Negative Affect* | | 2.26 | .70 |  |
| PANAS_2 | Distressed | 2.37 | 1.16 | .73 |
| PANAS_4 | Upset | 2.37 | 1.03 | .66 |
| PANAS_6 | Guilty | 1.64 | .94 | .33 |
| PANAS_8 | Hostile | 2.29 | 1.05 | .67 |
| PANAS_10 | Proud | 1.67 | .98 | .44 |
| PANAS_12 | Alert | 2.81 | 1.18 | .60 |
| PANAS_14 | Inspired | 2.06 | 1.15 | .28 |
| PANAS_16 | Determined | 2.68 | 1.14 | .73 |
| PANAS_18 | Jittery | 2.37 | 1.16 | .75 |
| PANAS_20 | Afraid | 2.30 | 1.10 | .63 |

*Note*. *M* = mean; *SD* = standard deviation; *rtt* = item-total scale-score-corrected correlation coefficient.

Table S3. Psychometric Properties of the Ten Item Personality Inventory

| Item | Text | *M* | *SD* |
| --- | --- | --- | --- |
| *Extraversion* | | 4.10 | 1.40 |
| TIPI_1 | Extraverted, enthusiastic. | 4.60 | 1.70 |
| TIPI_6 | Reserved, quiet. (R) | 3.60 | 1.67 |
|  |  |  |  |
| *Agreeableness* | | 5.11 | 1.10 |
| TIPI_2 | Critical, quarrelsome. (R) | 4.51 | 1.77 |
| TIPI_7 | Sympathetic, warm. | 5.70 | 1.08 |
|  | |  |  |
| *Conscientiousness* | | 5.43 | 1.09 |
| TIPI_3 | Dependable, self-disciplined. | 5.90 | 1.01 |
| TIPI_8 | Disorganized, careless. (R) | 4.96 | 1.68 |
|  | |  |  |
| *Neuroticism* | | 3.30 | 1.37 |
| TIPI_4 | Anxious, easily upset. | 3.57 | 1.83 |
| TIPI_9 | Calm, emotionally stable. (R) | 3.02 | 1.43 |
|  |  |  |  |
| *Openness* | | 4.41 | 1.10 |
| TIPI_5 | Open to new experiences, complex. | 5.48 | 1.20 |
| TIPI_10 | Conventional, uncreative. (R) | 3.34 | 1.54 |

*Note*. *M* = mean; *SD* = standard deviation; (R) = item reverse.

Table S4. Psychometric Properties of the Psychopathy subscale.

| Item | Text | *M* | *SD* | *rtt* |
| --- | --- | --- | --- | --- |
| DTDD_5 | I tend to lack remorse. | 2.00 | 1.08 | .49 |
| DTDD_6 | I tend to be unconcerned with the morality of my actions. | 1.54 | .85 | .59 |
| DTDD_7 | I tend to be callous or insensitive. | 1.74 | .95 | .72 |
| DTDD_8 | I tend to be cynical. | 1.93 | 1.10 | .77 |

*Note*. *M* = mean; *SD* = standard deviation; *rtt* = item-total scale-score-corrected correlation coefficient.

Table S5. Psychometric Properties of the Positivity Scale.

| Item | Text | *M* | *SD* | *rtt* |
| --- | --- | --- | --- | --- |
| POS_1 | I have great faith in the future. | 3.63 | 1.08 | .63 |
| POS_3 | Others are generally here for me when I need them. | 4.48 | .89 | .34 |
| POS_4 | I look forward to the future with hope and enthusiasm. | 3.79 | 1.08 | .73 |
| POS_6 | At times, the future seems unclear to me. (R) | 3.09 | 1.25 | .38 |
| POS_7 | I feel I have many things to be proud of. | 4.13 | .88 | .57 |
| POS_8 | I generally feel confident in myself. | 3.77 | 1.06 | .61 |

*Note*. *M* = mean; *SD* = standard deviation; *rtt* = item-total scale-score-corrected correlation coefficient; (R) = item reverse. Item 5 “On the whole, I am satisfied with myself.” was dropped because deemed as overlapping with measures of subjective well-being.

Table S6. Psychometric Properties of the Job Insecurity Scale.

| Item | Text | *M* | *SD* | *rtt* |
| --- | --- | --- | --- | --- |
| JI_1 | I am worried about having to leave my job before I would like to. | 2.82 | 1.32 | .62 |
| JI_2 | There is a risk that I will have to leave my present job in the year to come. | 2.36 | 1.24 | .85 |
| JI_3 | I feel uneasy about losing my job in the near future. | 2.98 | 1.39 | .71 |
| JI_4 | Chances are, I will soon lose my job. | 2.15 | 1.11 | .88 |
| JI_5 | I am sure I can keep my job. (R) | 2.20 | 1.05 | .78 |
| JI_6 | I feel insecure about the future of my job. | 2.80 | 1.28 | .67 |
| JI_7 | I think I might lose my job in the near future. | 2.35 | 1.15 | .85 |

*Note*. *M* = mean; *SD* = standard deviation; *rtt* = item-total scale-score-corrected correlation coefficient; (R) = item reverse.

Table S7. Psychometric Properties of the Generalized Social Trust Scale.

| Item | Text | | *M* | *SD* | *rtt* |
| --- | --- | --- | --- | --- | --- |
| *Trust in Known Others* | | | 3.50 | .61 |  |
| TRUSTKO_1 | | Your family members | 4.44 | .80 | .41 |
| TRUSTKO_2 | | Your friends | 3.87 | .85 | .60 |
| TRUSTKO_3 | | Your neighbors | 2.59 | .92 | .53 |
| TRUSTKO_4 | | Your work or study colleagues | 3.11 | .89 | .68 |
|  | | |  |  |  |
| *Trust in Unknown Others* | | | 2.40 | .72 |  |
| TRUSTUO_1 | | People you don't know who are of your nationality | 2.42 | .76 | .81# |
| TRUSTUO_2 | | People you don't know who are of another nationality | 2.38 | .75 |  |
|  | | |  |  |  |
| *Trust in Government* | | | 2.88 | .81 |  |
| TRUSTGO_1 | | The Italian Government | 2.82 | .95 | .81 |
| TRUSTGO_2 | | The Prime Minister Giuseppe Conte | 3.09 | .98 | .82 |
| TRUSTGO_3 | | The President of the Italian Republic Sergio Mattarella | 3.35 | 1.13 | .78 |
| TRUSTGO_4 | | The European Union | 2.27 | .93 | .47 |

*Note*. *M* = mean; *SD* = standard deviation; *rtt* = item-total scale-score-corrected correlation coefficient; # = for Trust in Unknown Other scale was not possible to compute the item-total scale-score-corrected correlation coefficient, therefore here is reported the correlation between the two items.

**Additional Results**

Correlation matrix among all variables and interactions referred in the main text regarding stressors and resources are presented in the following tables (Table S8-S17).

Table S8. Correlation Matrix

|  | **1** | **2** | **3** | **4** | **5** | **6** | **7** | **8** | **9** | **10** | **11** | **12** | **13** | **14** | **15** | **16** | **17** | **18** | **19** | **20** | **21** | **22** | **23** | **24** | **25** | **26** | **27** |
| --- | --- | --- | --- | --- | --- | --- | --- | --- | --- | --- | --- | --- | --- | --- | --- | --- | --- | --- | --- | --- | --- | --- | --- | --- | --- | --- | --- |
| 1. Sex | — |  |  |  |  |  |  |  |  |  |  |  |  |  |  |  |  |  |  |  |  |  |  |  |  |  |  |
| 2. Age | -.07 | — |  |  |  |  |  |  |  |  |  |  |  |  |  |  |  |  |  |  |  |  |  |  |  |  |  |
| 3. WFH | .17*** | -.09* | — |  |  |  |  |  |  |  |  |  |  |  |  |  |  |  |  |  |  |  |  |  |  |  |  |
| 4. Seniority | -.14*** | .86*** | -.14*** | — |  |  |  |  |  |  |  |  |  |  |  |  |  |  |  |  |  |  |  |  |  |  |  |
| 5. Day | -.05 | .16*** | -.02 | .18*** | — |  |  |  |  |  |  |  |  |  |  |  |  |  |  |  |  |  |  |  |  |  |  |
| 6. Contract | .19*** | -.43*** | .17*** | -.40*** | -.13** | — |  |  |  |  |  |  |  |  |  |  |  |  |  |  |  |  |  |  |  |  |  |
| 7. EconDis | -.01 | -.21*** | .06 | -.13** | -.02 | .18*** | — |  |  |  |  |  |  |  |  |  |  |  |  |  |  |  |  |  |  |  |  |
| 8. Other Infected | .03 | -.03 | -.01 | .00 | .10* | -.01 | .15*** | — |  |  |  |  |  |  |  |  |  |  |  |  |  |  |  |  |  |  |  |
| 9. nInfected | -.04 | .05 | .05 | .03 | .32** | -.08 | -.12** | -.06 | — |  |  |  |  |  |  |  |  |  |  |  |  |  |  |  |  |  |  |
| 10. Risk Inf | .06 | .02 | -.25*** | .03 | .01 | -.05 | -.09* | -.02 | .07 | — |  |  |  |  |  |  |  |  |  |  |  |  |  |  |  |  |  |
| 11. SelfAcce | -.01 | .05 | -.02 | .05 | -.01 | -.03 | -.05 | -.11** | -.01 | .03 | — |  |  |  |  |  |  |  |  |  |  |  |  |  |  |  |  |
| 12. PersonalGrowth | -.02 | -.24*** | .02 | -.22*** | -.06 | .18*** | -.06 | -.02 | -.02 | .00 | .30*** | — |  |  |  |  |  |  |  |  |  |  |  |  |  |  |  |
| 13. PurpLife | -.02 | -.27*** | .05 | -.24*** | -.05 | .09*** | -.06 | -.11** | .00 | .02 | .09* | .37*** | — |  |  |  |  |  |  |  |  |  |  |  |  |  |  |
| 14. EnvMastery | -.13** | .08 | -.04 | .09* | -.06 | -.03 | -.12** | -.05 | .05 | -.03 | .41*** | .35*** | .14*** | — |  |  |  |  |  |  |  |  |  |  |  |  |  |
| 15. Autonomy | -.07 | .13** | .01 | .11** | .02 | .01 | -.08 | .07 | .03 | -.08 | .24*** | .33*** | .07 | .38*** | — |  |  |  |  |  |  |  |  |  |  |  |  |
| 16. PosReations | .02 | .00 | -.03 | -.01 | -.07 | .02 | .00 | -.02 | -.04 | -.04 | .32*** | .30*** | .10* | .26*** | .27*** | — |  |  |  |  |  |  |  |  |  |  |  |
| 17. PA | -.16*** | .00 | -.08 | .02 | .10* | -.04 | -.11** | -.02 | .04 | -.01 | .30*** | .34*** | .13** | .35*** | .26*** | .26*** | — |  |  |  |  |  |  |  |  |  |  |
| 18. NA | .11** | -.22*** | .10* | -.18*** | -.01 | .15*** | .17*** | .11** | -.02 | .10* | -.25*** | -.18*** | .05 | -.34*** | -.15*** | -.22*** | -.18*** | — |  |  |  |  |  |  |  |  |  |
| 19. SWL | .01 | .22*** | -.06 | .17*** | .03 | -.12** | -.06 | -.01 | -.01 | .00 | .40*** | .07 | -.12** | .23*** | .09* | .21*** | .26*** | -.31*** | — |  |  |  |  |  |  |  |  |
| 20. Consc | .02 | .11** | -.03 | .13** | .01 | -.09* | -.10* | -.02 | .03 | -.03 | .24*** | .19*** | .14*** | .31*** | .19*** | .24*** | .28*** | -.20*** | .18*** | — |  |  |  |  |  |  |  |
| 21. Neu | .22*** | -.15*** | .18*** | -.12** | -.02 | .09* | .15*** | .02 | -.02 | .11* | -.24*** | -.22*** | .03 | -.39*** | -.26*** | -.28*** | -.27*** | .60*** | -.31*** | -.22*** | — |  |  |  |  |  |  |
| 22. Psyc | -.19*** | -.23*** | -.06 | -.16*** | -.02 | .05 | .06 | .11** | -.01 | -.10* | -.19*** | -.09* | .00 | -.11** | -.08 | -.29*** | -.06 | .13** | -.11** | -.22*** | .10* | — |  |  |  |  |  |
| 23. POS | -.03 | .17*** | -.08* | .10* | .00 | -.09* | -.10* | -.01 | -.03 | -.04 | .42*** | .27*** | -.02 | .37*** | .20*** | .33*** | .47*** | -.43*** | .61*** | .26*** | -.42*** | -.15*** | — |  |  |  |  |
| 24. JobIns | .08 | -.23*** | .18*** | -.22*** | -.01 | .30*** | .15*** | .15*** | .01 | .05 | -.22*** | -.08* | .01 | -.23*** | -.11** | -.11** | -.19*** | .28*** | -.26*** | -.14*** | .23*** | .03 | -.32*** | — |  |  |  |
| 25. TrustKO | .04 | .10* | .00 | .06 | .01 | -.08 | -.02 | -.13** | -.01 | -.03 | .21*** | .01 | -.08* | .09* | .03 | .27*** | .16*** | -.14*** | .28*** | .05 | -.14*** | -.14*** | .31*** | -.20*** | — |  |  |
| 26. TrustORG | .00 | .01 | -.03 | -.01 | -.01 | -.07 | -.08* | -.12** | .02 | -.01 | .12** | -.02 | -.09* | .12** | .00 | .12** | .12** | -.12** | .23*** | .02 | -.12** | -.03 | .25*** | -.17*** | .75*** | — |  |
| 27. TrustUO | -.10* | .17*** | -.02 | .12 | .10* | -.10* | -.13** | -.06 | -.06 | .03 | .05 | .01 | -.05 | .06 | .02 | .07 | .14*** | -.08 | .15*** | -.13** | -.12** | -.04 | .17*** | -.13** | .32*** | .25*** | — |
| 28. TrustGO | .01 | .08 | .04 | .04 | -.08 | -.01 | -.07 | -.23*** | .02 | -.02 | .10* | -.02 | -.06 | .06 | -.08 | .11** | .04 | -.10* | .08 | .06 | -.05 | -.13** | .15*** | -.16*** | .28*** | .20*** | .22*** |
| Mean | — | 39.46 | — | — | — | — | — | 42.08 | 1448.98 | 38.17 | 4.28 | 4.44 | 4.56 | 4.02 | 4.17 | 4.85 | 3.50 | 2.26 | 3.99 | 5.43 | 3.30 | 1.80 | 3.84 | 2.52 | 2.98 | 2.40 | 2.88 |
| Standard Deviation | — | 13.75 | — | — | — | — | — | 25.66 | 1129.33 | 25.38 | .73 | .82 | .92 | .80 | .82 | 1.01 | .62 | .70 | .98 | 1.09 | 1.37 | .74 | .67 | .98 | 1.02 | .72 | .81 |

*Note*. WFH = working from home; EcoDis = economic distress; Other Infected = probability of infection of other members of the famility; nInf = number of infected people in the belonging province; Risk Inf = risk or probability of being infected; SelfAcce = self-acceptence; PurpLife = purpose in life; EnvMastery = enviromental mastery; PosReations = positive relations; PA = positive affect; NA = negative affect; SWL = satisfaction with life; Consc = conscientiousness ; Neu = neuroticism; Psyc = psychopathy; POS = positivity; JobIns = job insecurity; TrustKO = trust in known other; TrustORG = trust in the organization; TrustUO = trust in unknown others; TrustGO = trust in government.

**p* < .05; ***p* < .01; ****p* < .001

Table S9. Predictors of Positive Affect with Interactions among Job Resources and Job Demands

|  | Positive Affect | | | | | | | | | | |
| --- | --- | --- | --- | --- | --- | --- | --- | --- | --- | --- | --- |
|  | Model 1 | | | | |  | Model 2 | | | | |
|  | *B* | LL | UL | *T* | *p* |  | *B* | LL | UL | *T* | *p* |
| Intercept | **3.78** | **3.48** | **4.08** | **24.80** | **.00** |  | **3.37** | **2.96** | **3.78** | **16.31** | **.00** |
| *Covariates* |  |  |  |  |  |  |  |  |  |  |  |
| 1. Sex | **-.19** | **-.28** | **-.09** | **-3.82** | **.00** |  | **-.18** | **-.27** | **-.08** | **-3.72** | **.00** |
| 2. Age | **-.01** | **-.02** | **-.01** | **-3.79** | **.00** |  | **-.01** | **-.02** | **-.01** | **-3.70** | **.00** |
| 3. Married *vs* single | .11 | -.01 | .23 | 1.86 | .06 |  | .12 | .00 | .24 | 1.92 | .06 |
| 4. Divorced *vs* single | **.30** | **.10** | **.50** | **2.98** | **.00** |  | **.31** | **.11** | **.51** | **3.10** | **.00** |
| 5. Public vs private | -.03 | -.14 | .09 | -.49 | .62 |  | -.02 | -.13 | .09 | -.35 | .73 |
| 6. Self *vs* public employed | .02 | -.09 | .13 | .36 | .72 |  | .04 | -.08 | .15 | .62 | .54 |
| 7. Work experience | .00 | .00 | .01 | 1.13 | .26 |  | .00 | .00 | .01 | 1.15 | .25 |
| 8. Day | **.02** | **.00** | **.03** | **2.50** | **.01** |  | **.02** | **.00** | **.03** | **2.38** | **.02** |
| 9. Center *vs* north | -.06 | -.22 | .10 | -.76 | .44 |  | -.04 | -.20 | .11 | -.54 | .59 |
| 10. South *vs* north | **-.23** | **-.45** | **-.01** | **-2.05** | **.04** |  | **-.22** | **-.45** | **.00** | **-2.00** | **.05** |
| 11. Islands *v*s north | -.10 | -.35 | .16 | -.75 | .45 |  | -.08 | -.34 | .17 | -.64 | .52 |
| *Job stressors* |  |  |  |  |  |  |  |  |  |  |  |
| 12. Indefinite *vs* temporary | .06 | -.06 | .18 | .97 | .33 |  | **.35** | **.11** | **.59** | **2.85** | **.00** |
| 13. Job insecurity | -.04 | -.09 | .01 | -1.49 | .14 |  | -.02 | -.11 | .07 | -.37 | .71 |
| *Job resources* |  |  |  |  |  |  |  |  |  |  |  |
| 14. Trust in organization | -.03 | -.11 | .04 | -.89 | .37 |  | .00 | -.18 | .19 | .04 | .97 |
| 15. Working from home | .01 | -.09 | .11 | .21 | .83 |  | **.48** | **.12** | **.83** | **2.64** | **.01** |
| *Personal Resources* |  |  |  |  |  |  |  |  |  |  |  |
| 16. Conscientiousness | **.10** | **.06** | **.14** | **4.64** | **.00** |  | **.10** | **.05** | **.14** | **4.49** | **.00** |
| 17. Positivity | **.37** | **.30** | **.45** | **9.61** | **.00** |  | **.38** | **.30** | **.45** | **9.68** | **.00** |
| *Personal vulnerabilities* |  |  |  |  |  |  |  |  |  |  |  |
| 18. Neuroticism | .00 | -.04 | .03 | -.24 | .81 |  | -.01 | -.04 | .03 | -.41 | .68 |
| 19. Probability of being infected | .00 | -.04 | .04 | .02 | .99 |  | .00 | -.04 | .04 | -.01 | .99 |
| 20. Psychopathy | -.01 | -.08 | .05 | -.41 | .68 |  | -.01 | -.07 | .06 | -.17 | .87 |
| 21. Economic distress | -.23 | -.51 | .05 | -1.59 | .11 |  | -.22 | -.50 | .06 | -1.56 | .12 |
| *Social stressors* |  |  |  |  |  |  |  |  |  |  |  |
| 22. N-infected | .00 | .00 | .00 | -.63 | .53 |  | .00 | .00 | .00 | -.60 | .55 |
| 23. Other infected (probability) | .00 | .00 | .00 | .36 | .72 |  | .00 | .00 | .00 | .42 | .68 |
| *Social Resources* |  |  |  |  |  |  |  |  |  |  |  |
| 24. Trust in known others | .07 | -.04 | .18 | 1.24 | .22 |  | .06 | -.05 | .17 | 1.04 | .30 |
| 25. Trust in unknown others | **.07** | **.00** | **.14** | **2.10** | **.04** |  | **.07** | **.01** | **.14** | **2.12** | **.03** |
| 26. Trust in Government | -.03 | -.08 | .03 | -.93 | .35 |  | -.02 | -.08 | .04 | -.68 | .50 |
| *Interactions* |  |  |  |  |  |  |  |  |  |  |  |
| 27. Indefinite *vs* temporary × Trust in organization |  |  |  |  |  |  | .03 | -.08 | .14 | .59 | .56 |
| 28. Job insecurity × Trust in organization |  |  |  |  |  |  | -.03 | -.07 | .02 | -1.10 | .27 |
| 29. Indefinite *vs* temporary × Working from home |  |  |  |  |  |  | **-.36** | **-.62** | **-.09** | **-2.66** | **.01** |
| 30. Job insecurity × Working from home |  |  |  |  |  |  | -.02 | -.13 | .08 | -.45 | .65 |
| *R²* | .33 | | | | |  | .34 | | | | |
| *F* | 10.61*** | | | | |  | 9.60*** | | | | |
| *𝛥R2* |  | | | | |  | .01 | | | | |
| *𝛥F* |  | | | | |  | 2.40* | | | | |

*Note*. LL = lower limit of the confidence interval; UL = upper limit of the confidence interval. Significant predictors are depicted in bold.

**p* < .05; ***p* < .01; ****p* < .001

Table S10. Predictors of Autonomy with Interactions among Job Resources and Job Demand

|  | Autonomy | | | | | | | | | | |
| --- | --- | --- | --- | --- | --- | --- | --- | --- | --- | --- | --- |
|  | Model 1 | | | | |  | Model 2 | | | | |
|  | *B* | LL | UL | *T* | *p* |  | *B* | LL | UL | *T* | *p* |
| Intercept | **4.32** | **3.88** | **4.77** | **19.06** | **.00** |  | **4.52** | **3.92** | **5.12** | **14.76** | **.00** |
| *Covariates* |  |  |  |  |  |  |  |  |  |  |  |
| 1. Sex | -.10 | -.24 | .04 | -1.39 | .16 |  | -.10 | -.24 | .04 | -1.41 | .16 |
| 2. Age | .00 | -.01 | .02 | .87 | .38 |  | .00 | -.01 | .01 | .82 | .41 |
| 3. Married *vs* single | .03 | -.15 | .21 | .36 | .72 |  | .04 | -.13 | .22 | .49 | .63 |
| 4. Divorced *vs* single | .08 | -.21 | .37 | .54 | .59 |  | .09 | -.21 | .38 | .58 | .56 |
| 5. Public vs private | .05 | -.11 | .22 | .63 | .53 |  | .06 | -.11 | .23 | .70 | .49 |
| 6. Self *vs* public employed | -.05 | -.22 | .11 | -.62 | .54 |  | -.05 | -.21 | .12 | -.56 | .58 |
| 7. Work experience | .00 | -.01 | .01 | .23 | .82 |  | .00 | -.01 | .01 | .35 | .73 |
| 8. Day | .00 | -.03 | .02 | -.25 | .80 |  | -.01 | -.03 | .01 | -.74 | .46 |
| 9. Center *vs* north | **-.28** | **-.51** | **-.05** | **-2.37** | **.02** |  | **-.24** | **-.47** | **-.01** | **-2.02** | **.04** |
| 10. South *vs* north | **-.39** | **-.72** | **-.06** | **-2.34** | **.02** |  | **-.39** | **-.72** | **-.06** | **-2.32** | **.02** |
| 11. Islands *v*s north | **-.49** | **-.87** | **-.10** | **-2.50** | **.01** |  | **-.45** | **-.83** | **-.07** | **-2.32** | **.02** |
| *Job Stressors* |  |  |  |  |  |  |  |  |  |  |  |
| 12. Indefinite *vs* temporary | **.22** | **.04** | **.39** | **2.37** | **.02** |  | .28 | -.07 | .64 | 1.56 | .12 |
| 13. Job insecurity | -.05 | -.13 | .03 | -1.30 | .19 |  | **-.20** | **-.33** | **-.06** | **-2.89** | **.00** |
| *Job resources* |  |  |  |  |  |  |  |  |  |  |  |
| 14. Trust in organization | -.04 | -.15 | .07 | -.78 | .44 |  | .23 | -.04 | .50 | 1.68 | .09 |
| 15. Working from home | .12 | -.02 | .27 | 1.66 | .10 |  | -.27 | -.80 | .25 | -1.02 | .31 |
| *Personal Resources* |  |  |  |  |  |  |  |  |  |  |  |
| 16. Conscientiousness | **.09** | **.03** | **.15** | **2.81** | **.01** |  | **.09** | **.03** | **.15** | **2.86** | **.00** |
| 17. Positivity | .09 | -.02 | .21 | 1.62 | .11 |  | .10 | -.02 | .21 | 1.70 | .09 |
| *Personal Vulnerabilities* |  |  |  |  |  |  |  |  |  |  |  |
| 18. Neuroticism | **-.10** | **-.15** | **-.05** | **-3.66** | **.00** |  | **-.10** | **-.15** | **.04** | **-3.52** | **.00** |
| 19. Probability of being infected | .06 | .00 | .12 | 1.87 | .06 |  | **.06** | **.00** | **.12** | **2.11** | **.04** |
| 20. Psychopathy | -.03 | -.13 | .06 | -.69 | .49 |  | -.02 | -.11 | .08 | -.34 | .73 |
| 21. Economic distress | -.16 | -.58 | .26 | -.75 | .46 |  | -.13 | -.55 | .28 | -.63 | .53 |
| *Social stressors* |  |  |  |  |  |  |  |  |  |  |  |
| 22. N-infected | .00 | .00 | .00 | -.80 | .43 |  | .00 | .00 | .00 | -.67 | .50 |
| 23. Other infected (probability) | .00 | .00 | .00 | -.92 | .36 |  | .00 | .00 | .00 | -1.22 | .22 |
| *Social Resources* |  |  |  |  |  |  |  |  |  |  |  |
| 24. Trust in known others | .05 | -.11 | .22 | .60 | .55 |  | .05 | -.11 | .22 | .61 | .54 |
| 25. Trust in unknown others | .01 | -.08 | .11 | .25 | .80 |  | .03 | -.07 | .13 | .65 | .52 |
| 26. Trust in Government | **-.11** | **-.20** | **-.03** | **-2.61** | **.01** |  | **-.11** | **-.20** | **-.03** | **-2.63** | **.01** |
| *Interactions* |  |  |  |  |  |  |  |  |  |  |  |
| 27. Indefinite *vs* temporary × Trust in organization |  |  |  |  |  |  | -.05 | -.21 | .11 | -.58 | .56 |
| 28. Job insecurity × Trust in organization |  |  |  |  |  |  | **-.08** | **-.15** | **-.01** | **-2.16** | **.03** |
| 29. Indefinite *vs* temporary × Working from home |  |  |  |  |  |  | -.11 | -.49 | .28 | -.53 | .59 |
| 30. Job insecurity × Working from home |  |  |  |  |  |  | **.21** | **.06** | **.37** | **2.73** | **.01** |
| *R²* | .15 | | | | |  | .17 | | | | |
| *F* | 3.77*** | | | | |  | 3.81*** | | | | |
| *𝛥R2* |  | | | | |  | .02 | | | | |
| *𝛥F* |  | | | | |  | 3.60** | | | | |

*Note*. LL = lower limit of the confidence interval; UL = upper limit of the confidence interval. Significant predictors are depicted in bold.

**p* < .05; ***p* < .01; ****p* < .001

Table S11. Predictors of Self-Acceptance with Interactions among Personal Resources and Job Stressors

|  | Self-Acceptance | | | | | | | | | | |
| --- | --- | --- | --- | --- | --- | --- | --- | --- | --- | --- | --- |
|  | Model 1 | | | | |  | Model 2 | | | | |
|  | *B* | LL | UL | *T* | *p* |  | *B* | LL | UL | *T* | *p* |
| Intercept | **4.18** | **3.81** | **4.55** | **22.01** | **.00** |  | **4.16** | **3.79** | **4.53** | **21.96** | **.00** |
| *Covariates* |  |  |  |  |  |  |  |  |  |  |  |
| 1. Sex | -.04 | -.16 | .08 | -.63 | .53 |  | -.05 | -.17 | .07 | -.85 | .40 |
| 2. Age | **-.01** | **-.02** | **.00** | **-2.55** | **.01** |  | **-.01** | **-.02** | **.00** | **-2.59** | **.01** |
| 3. Married *vs* single | **.19** | **.04** | **.34** | **2.55** | **.01** |  | **.19** | **.04** | **.34** | **2.55** | **.01** |
| 4. Divorced *vs* single | -.01 | -.26 | .23 | -.11 | .91 |  | .00 | -.25 | .24 | -.01 | .99 |
| 5. Public vs private | .07 | -.07 | .21 | .96 | .34 |  | .06 | -.08 | .20 | .83 | .41 |
| 6. Self *vs* public employed | .06 | -.07 | .20 | .91 | .36 |  | .06 | -.08 | .20 | .88 | .38 |
| 7. Work experience | .01 | .00 | .01 | 1.33 | .18 |  | .01 | .00 | .01 | 1.37 | .17 |
| 8. Day | .00 | -.02 | .02 | -.21 | .83 |  | .00 | -.02 | .02 | -.31 | .76 |
| 9. Center *vs* north | .01 | -.19 | .20 | .07 | .94 |  | .01 | -.19 | .20 | .08 | .94 |
| 10. South *vs* north | .07 | -.21 | .35 | .50 | .61 |  | .07 | -.21 | .34 | .49 | .62 |
| 11. Islands *v*s north | -.23 | -.55 | .09 | -1.42 | .16 |  | -.25 | -.57 | .07 | -1.55 | .12 |
| *Job Stressors* |  |  |  |  |  |  |  |  |  |  |  |
| 12. Indefinite *vs* temporary | .06 | -.09 | .21 | .78 | .43 |  | .07 | -.08 | .22 | .94 | .35 |
| 13. Job insecurity | **-.07** | **-.14** | **-.01** | **-2.31** | **.02** |  | **-.08** | **-.14** | **-.01** | **-2.35** | **.02** |
| *Job resources* |  |  |  |  |  |  |  |  |  |  |  |
| 14. Trust in organization | -.07 | -.16 | .02 | -1.51 | .13 |  | -.05 | -.15 | .04 | -1.17 | .24 |
| 15. Working from home | .09 | -.04 | .21 | 1.37 | .17 |  | .09 | -.03 | .22 | 1.51 | .13 |
| *Personal Resources* |  |  |  |  |  |  |  |  |  |  |  |
| 16. Conscientiousness | .07 | .01 | .12 | 2.47 | .01 |  | **.18** | **.00** | **.37** | **1.98** | **.05** |
| 17. Positivity | **.34** | **.25** | **.44** | **7.07** | **.00** |  | **.51** | **.21** | **.80** | **3.36** | **.00** |
| *Personal Vulnerabilities* |  |  |  |  |  |  |  |  |  |  |  |
| 18. Neuroticism | -.03 | -.07 | .02 | -1.29 | .20 |  | -.03 | -.07 | .02 | -1.22 | .22 |
| 19. Probability of being infected | -.05 | -.10 | .00 | -1.92 | .05 |  | -.05 | -.10 | .00 | -1.95 | .05 |
| 20. Psychopathy | **-.10** | **-.18** | **-.02** | **-2.52** | **.01** |  | **-.10** | **-.18** | **-.02** | **-2.57** | **.01** |
| 21. Economic distress | -.03 | -.38 | .32 | -.15 | .88 |  | -.02 | -.37 | .33 | -.11 | .91 |
| *Social stressors* |  |  |  |  |  |  |  |  |  |  |  |
| 22. N-infected | .00 | .00 | .00 | -.34 | .74 |  | .00 | .00 | .00 | -.35 | .73 |
| 23. Other infected (probability) | .00 | .00 | .00 | 1.25 | .21 |  | .00 | .00 | .00 | .99 | .32 |
| *Social Resources* |  |  |  |  |  |  |  |  |  |  |  |
| 24. Trust in known others | **.16** | **.02** | **.30** | **2.28** | **.02** |  | .14 | .00 | .28 | 1.91 | .06 |
| 25. Trust in unknown others | -.02 | -.11 | .06 | -.58 | .56 |  | -.02 | -.10 | .06 | -.56 | .57 |
| 26. Trust in Government | -.01 | -.08 | .06 | -.18 | .86 |  | .00 | -.07 | .07 | .03 | .98 |
| *Interactions* |  |  |  |  |  |  |  |  |  |  |  |
| 27. Indefinite *vs* temporary × Conscientiousness |  |  |  |  |  |  | .04 | -.09 | .16 | .61 | .54 |
| 28. Job insecurity × Conscientiousness |  |  |  |  |  |  | **-.07** | **-.12** | **-.01** | **-2.47** | **.01** |
| 29. Indefinite *vs* temporary × Positivity |  |  |  |  |  |  | -.01 | -.21 | .19 | -.10 | .92 |
| 30. Job insecurity × Positivity |  |  |  |  |  |  | -.06 | -.13 | .02 | -1.39 | .17 |
| *R²* | .26 | | | | |  | .27 | | | | |
| *F* | 7.64*** | | | | |  | 7.03*** | | | | |
| *𝛥R2* |  | | | | |  | .01 | | | | |
| *𝛥F* |  | | | | |  | 2.56* | | | | |

*Note*. LL = lower limit of the confidence interval; UL = upper limit of the confidence interval. Significant predictors are depicted in bold.

**p* < .05; ***p* < .01; ****p* < .001

Table S12. Predictors of Environmental Mastery with Interactions among Personal Resources and Personal Vulnerabilities

|  | Environmental Mastery | | | | | | | | | | |
| --- | --- | --- | --- | --- | --- | --- | --- | --- | --- | --- | --- |
|  | Model 1 | | | | |  | Model 2 | | | | |
|  | *B* | LL | UL | *T* | *p* |  | *B* | LL | UL | *T* | *p* |
| Intercept | **4.23** | **3.83** | **4.63** | **2.83** | **.00** |  | 4.15 | 3.75 | 4.55 | 2.44 | .00 |
| *Covariates* |  |  |  |  |  |  |  |  |  |  |  |
| 1. Sex | **-.16** | **-.29** | **-.04** | **-2.52** | **.01** |  | **-.14** | **-.27** | **-.01** | **-2.15** | **.03** |
| 2. Age | .00 | -.01 | .01 | -.79 | .43 |  | .00 | -.01 | .00 | -.91 | .36 |
| 3. Married *vs* single | -.06 | -.22 | .10 | -.72 | .47 |  | -.06 | -.22 | .10 | -.76 | .45 |
| 4. Divorced *vs* single | .00 | -.26 | .26 | .01 | .99 |  | -.02 | -.28 | .24 | -.15 | .88 |
| 5. Public vs private | .06 | -.09 | .21 | .79 | .43 |  | .04 | -.11 | .19 | .58 | .57 |
| 6. Self *vs* public employed | -.02 | -.17 | .13 | -.28 | .78 |  | -.02 | -.17 | .12 | -.31 | .76 |
| 7. Work experience | .01 | .00 | .02 | 1.40 | .16 |  | .01 | .00 | .02 | 1.57 | .12 |
| 8. Day | **-.03** | **-.05** | **-.01** | **-2.48** | **.01** |  | **-.03** | **-.05** | **-.01** | **-2.52** | **.01** |
| 9. Center *vs* north | -.10 | -.31 | .11 | -.95 | .34 |  | -.09 | -.30 | .12 | -.87 | .39 |
| 10. South *vs* north | -.04 | -.34 | .26 | -.27 | .79 |  | -.06 | -.35 | .24 | -.36 | .72 |
| 11. Islands *v*s north | **-.42** | **-.76** | **-.08** | **-2.41** | **.02** |  | **-.45** | **-.79** | **-.11** | **-2.58** | **.01** |
| *Job Stressors* |  |  |  |  |  |  |  |  |  |  |  |
| 12. Indefinite *vs* temporary | .13 | -.03 | .29 | 1.55 | .12 |  | .13 | -.03 | .29 | 1.62 | .11 |
| 13. Job insecurity | **-.08** | **-.15** | **-.01** | **-2.24** | **.03** |  | **-.08** | **-.15** | **-.01** | **-2.37** | **.02** |
| *Job resources* |  |  |  |  |  |  |  |  |  |  |  |
| 14. Trust in organization | **.08** | **-.01** | **.18** | **1.70** | **.09** |  | .09 | -.01 | .19 | 1.84 | .07 |
| 15. Working from home | .10 | -.03 | .23 | 1.52 | .13 |  | .10 | -.03 | .23 | 1.53 | .13 |
| *Personal Resources* |  |  |  |  |  |  |  |  |  |  |  |
| 16. Conscientiousness | **.14** | **.08** | **.20** | **4.91** | **.00** |  | **.14** | **.08** | **.20** | **4.85** | **.00** |
| 17. Positivity | **.25** | **.15** | **.35** | **4.79** | **.00** |  | **.26** | **.16** | **.36** | **5.00** | **.00** |
| *Personal Vulnerabilities* |  |  |  |  |  |  |  |  |  |  |  |
| 18. Neuroticism | **-.13** | **-.17** | **-.08** | **-5.17** | **.00** |  | **-.13** | **-.18** | **-.08** | **-5.25** | **.00** |
| 19. Probability of being infected | .00 | -.05 | .05 | -.02 | .98 |  | .00 | -.05 | .05 | -.06 | .95 |
| 20. Psychopathy | -.06 | -.14 | .03 | -1.35 | .18 |  | -.06 | -.14 | .03 | -1.31 | .19 |
| 21. Economic distress | -.17 | -.54 | .21 | -.88 | .38 |  | -.16 | -.54 | .21 | -.85 | .40 |
| *Social stressors* |  |  |  |  |  |  |  |  |  |  |  |
| 22. N-infected | .00 | .00 | .00 | .75 | .46 |  | .00 | .00 | .00 | .67 | .50 |
| 23. Other infected (probability) | .00 | .00 | .00 | .55 | .59 |  | .00 | .00 | .00 | .65 | .51 |
| *Social Resources* |  |  |  |  |  |  |  |  |  |  |  |
| 24. Trust in known others | -.13 | -.28 | .02 | -1.71 | .09 |  | -.13 | -.28 | .02 | -1.72 | .09 |
| 25. Trust in unknown others | .03 | -.05 | .12 | .76 | .45 |  | .04 | -.05 | .12 | .80 | .42 |
| 26. Trust in Government | -.02 | -.10 | .05 | -.61 | .54 |  | -.02 | -.10 | .06 | -.53 | .60 |
| *Interactions* |  |  |  |  |  |  |  |  |  |  |  |
| 27. Conscientiousness × Neuroticism |  |  |  |  |  |  | -.03 | -.07 | .01 | -1.50 | .13 |
| 28. Conscientiousness × Other infected (probability) |  |  |  |  |  |  | .01 | -.04 | .06 | .51 | .61 |
| 29. Conscientiousness × Psychopathy |  |  |  |  |  |  | .01 | -.06 | .08 | .36 | .72 |
| 30. Conscientiousness × Economic distress |  |  |  |  |  |  | .08 | -.25 | .41 | .47 | .64 |
| 31. Positivity × Neuroticism |  |  |  |  |  |  | **-.10** | **-.16** | **-.03** | **-2.96** | **.00** |
| 32. Positivity × Other infected (probability) |  |  |  |  |  |  | -.03 | -.11 | .05 | -.70 | .48 |
| 33. Positivity × Psychopathy |  |  |  |  |  |  | -.04 | -.15 | .07 | -.66 | .51 |
| 34. Positivity × Economic distress |  |  |  |  |  |  | .45 | -.11 | 1.01 | 1.58 | .11 |
| *R²* | .28 | | | | |  | .31 | | | | |
| *F* | 8.66*** | | | | |  | 7.28*** | | | | |
| *𝛥R2* |  | | | | |  | .02 | | | | |
| *𝛥F* |  | | | | |  | 2.28* | | | | |

*Note*. LL = lower limit of the confidence interval; UL = upper limit of the confidence interval. Significant predictors are depicted in bold.

**p* < .05; ***p* < .01; ****p* < .001

Table S14. Predictors of Autonomy with Interactions among Personal Resources and Personal Vulnerabilities

|  | Autonomy | | | | | | | | | | |
| --- | --- | --- | --- | --- | --- | --- | --- | --- | --- | --- | --- |
|  | Model 1 | | | | |  | Model 2 | | | | |
|  | *B* | LL | UL | *T* | *p* |  | *B* | LL | UL | *T* | *p* |
| Intercept | **4.32** | **3.88** | **4.77** | **19.06** | **.00** |  | **4.22** | **3.78** | **4.66** | **18.72** | **.01** |
| *Covariates* |  |  |  |  |  |  |  |  |  |  |  |
| 1. Sex | -.10 | -.24 | .04 | -1.39 | .16 |  | -.07 | -.21 | .07 | -1.01 | .31 |
| 2. Age | .00 | -.01 | .02 | .87 | .38 |  | .00 | -.01 | .02 | .90 | .37 |
| 3. Married *vs* single | .03 | -.15 | .21 | .36 | .72 |  | .01 | -.17 | .18 | .07 | .94 |
| 4. Divorced *vs* single | .08 | -.21 | .37 | .54 | .59 |  | .03 | -.26 | .32 | .19 | .85 |
| 5. Public vs private | .05 | -.11 | .22 | .63 | .53 |  | .04 | -.13 | .21 | .49 | .62 |
| 6. Self *vs* public employed | -.05 | -.22 | .11 | -.62 | .54 |  | -.05 | -.21 | .11 | -.61 | .54 |
| 7. Work experience | .00 | -.01 | .01 | .23 | .82 |  | .00 | -.01 | .01 | .40 | .69 |
| 8. Day | .00 | -.03 | .02 | -.25 | .80 |  | .00 | -.02 | .02 | -.20 | .84 |
| 9. Center *vs* north | **-.28** | **-.51** | **-.05** | **-2.37** | **.02** |  | **-.26*** | **-.49** | **-.03** | **-2.18** | **.03** |
| 10. South *vs* north | **-.39** | **-.72** | **-.06** | **-2.34** | **.02** |  | **-.44**** | **-.77** | **-.11** | **-2.61** | **.01** |
| 11. Islands *v*s north | **-.49** | **-.87** | **-.10** | **-2.50** | **.01** |  | **-.50**** | **-.88** | **-.12** | **-2.60** | **.01** |
| *Job Stressors* |  |  |  |  |  |  |  |  |  |  |  |
| 12. Indefinite *vs* temporary | **.22** | **.04** | **.39** | **2.37** | **.02** |  | **.23** | **.05** | **.41** | **2.55** | **.01** |
| 13. Job insecurity | -.05 | -.13 | .03 | -1.30 | .19 |  | -.05 | -.13 | .02 | -1.32 | .19 |
| *Job resources* |  |  |  |  |  |  |  |  |  |  |  |
| 14. Trust in organization | -.04 | -.15 | .07 | -.78 | .44 |  | -.04 | -.15 | .07 | -.71 | .48 |
| 15. Working from home | .12 | -.02 | .27 | 1.66 | .10 |  | .11 | -.04 | .26 | 1.47 | .14 |
| *Personal Resources* |  |  |  |  |  |  |  |  |  |  |  |
| 16. Conscientiousness | **.09** | **.03** | **.15** | **2.81** | **.01** |  | **.09** | **.02** | **.15** | **2.64** | **.01** |
| 17. Positivity | .09 | -.02 | .21 | 1.62 | .11 |  | .11 | -.01 | .22 | 1.87 | .06 |
| *Personal Vulnerabilities* |  |  |  |  |  |  |  |  |  |  |  |
| 18. Neuroticism | **-.10** | **-.15** | **.05** | **-3.66** | **.00** |  | **-.10** | **-.15** | **.04** | **-3.60** | **.00** |
| 19. Probability of being infected | .06 | .00 | .12 | 1.87 | .06 |  | **.06** | **.00** | **.12** | **1.95** | **.05** |
| 20. Psychopathy | -.03 | -.13 | .06 | -.69 | .49 |  | -.02 | -.11 | .08 | -.38 | .71 |
| 21. Economic distress | -.16 | -.58 | .26 | -.75 | .46 |  | -.24 | -.66 | .18 | -1.12 | .26 |
| *Social stressors* |  |  |  |  |  |  |  |  |  |  |  |
| 22. N-infected | .00 | .00 | .00 | -.80 | .43 |  | .00 | .00 | .00 | -1.17 | .24 |
| 23. Other infected (probability) | .00 | .00 | .00 | -.92 | .36 |  | .00 | .00 | .00 | -.91 | .36 |
| *Social Resources* |  |  |  |  |  |  |  |  |  |  |  |
| 24. Trust in known others | .05 | -.11 | .22 | .60 | .55 |  | .05 | -.12 | .21 | .57 | .57 |
| 25. Trust in unknown others | .01 | -.08 | .11 | .25 | .80 |  | .02 | -.07 | .12 | .46 | .65 |
| 26. Trust in Government | **-.11** | **-.20** | **-.03** | **-2.61** | **.01** |  | -.10 | -.19 | -.02 | -2.36 | .02 |
| *Interactions* |  |  |  |  |  |  |  |  |  |  |  |
| 27. Conscientiousness × Neuroticism |  |  |  |  |  |  | -.02 | -.06 | -.02 | -.82 | .41 |
| 28. Conscientiousness × Other infected (probability) |  |  |  |  |  |  | .02 | -.04 | .07 | .66 | .51 |
| 29. Conscientiousness × Psychopathy |  |  |  |  |  |  | **.08** | **.00** | **.16** | **2.00** | **.05** |
| 30. Conscientiousness × Economic distress |  |  |  |  |  |  | **-.37** | **-.73** | **-.01** | **-2.01** | **.05** |
| 31. Positivity × Neuroticism |  |  |  |  |  |  | **-.12** | **-.19** | **.05** | **-3.30** | **.00** |
| 32. Positivity × Other infected (probability) |  |  |  |  |  |  | -.08 | -.17 | .02 | -1.63 | .10 |
| 33. Positivity × Psychopathy |  |  |  |  |  |  | -.03 | -.15 | .10 | -.44 | .66 |
| 34. Positivity × Economic distress |  |  |  |  |  |  | .50 | -.12 | 1.13 | 1.59 | .11 |
| *R²* | .15 | | | | |  | .18 | | | | |
| *F* | 3.77*** | | | | |  | 3.68*** | | | | |
| *𝛥R2* |  | | | | |  | .04 | | | | |
| *𝛥F* |  | | | | |  | 3.04** | | | | |

*Note*. LL = lower limit of the confidence interval; UL = upper limit of the confidence interval. Significant predictors are depicted in bold.

**p* < .05; ***p* < .01; ****p* < .001

Table S15. Predictors of Personal Growth with Interactions among Personal Vulnerabilities

|  | Personal Growth | | | | | | | | | | |
| --- | --- | --- | --- | --- | --- | --- | --- | --- | --- | --- | --- |
|  | Model 1 | | | | |  | Model 2 | | | | |
|  | *B* | LL | UL | *T* | *p* |  | *B* | LL | UL | *T* | *p* |
| Intercept | **4.69** | **4.27** | **5.11** | **22.06** | **.00** |  | **4.70** | **4.28** | **5.12** | **22.04** | **.00** |
| *Covariates* |  |  |  |  |  |  |  |  |  |  |  |
| 1. Sex | -.10 | -.23 | .04 | -1.43 | .15 |  | -.09 | -.22 | .04 | -1.30 | .19 |
| 2. Age | **-.02** | **-.03** | **-.01** | **-3.47** | **.00** |  | **-.02** | **-.03** | **-.01** | **-3.38** | **.00** |
| 3. Married *vs* single | -.10 | -.27 | .07 | -1.16 | .25 |  | -.09 | -.26 | .08 | -1.05 | .29 |
| 4. Divorced *vs* single | .17 | -.11 | .44 | 1.19 | .24 |  | .16 | -.11 | .44 | 1.15 | .25 |
| 5. Public vs private | -.06 | -.22 | .10 | -.76 | .45 |  | -.05 | -.21 | .11 | -.62 | .54 |
| 6. Self *vs* public employed | .00 | -.15 | .16 | .06 | .95 |  | .01 | -.14 | .17 | .17 | .86 |
| 7. Work experience | .00 | -.01 | .01 | -.12 | .91 |  | .00 | -.01 | .01 | -.22 | .83 |
| 8. Day | .00 | -.02 | .02 | -.18 | .86 |  | .00 | -.02 | .02 | -.37 | .71 |
| 9. Center *vs* north | **-.23** | **-.45** | **-.01** | **-2.08** | **.04** |  | **-.24** | **-.45** | **-.02** | **-2.16** | **.03** |
| 10. South *vs* north | **-.37** | **-.68** | **-.06** | **-2.37** | **.02** |  | **-.41** | **-.72** | **-.10** | **-2.61** | **.01** |
| 11. Islands *v*s north | -.27 | -.63 | .09 | -1.49 | .14 |  | -.33 | -.68 | .03 | -1.79 | .07 |
| *Job Stressors* |  |  |  |  |  |  |  |  |  |  |  |
| 12. Indefinite *vs* temporary | **.26** | **.10** | **.43** | **3.08** | **.00** |  | **.28** | **.11** | **.46** | **3.28** | **.00** |
| 13. Job insecurity | **-.08** | **-.16** | **-.01** | **-2.34** | **.02** |  | **-.11** | **-.18** | **-.04** | **-2.94** | **.00** |
| *Job resources* |  |  |  |  |  |  |  |  |  |  |  |
| 14. Trust in organization | **-.10** | **-.21** | **.00** | **-2.02** | **.04** |  | **-.12** | **-.22** | **-.02** | **-2.27** | **.02** |
| 15. Working from home | .09 | -.04 | .23 | 1.35 | .18 |  | .10 | -.04 | .24 | 1.41 | .16 |
| *Personal Resources* |  |  |  |  |  |  |  |  |  |  |  |
| 16. Conscientiousness | **.10** | **.04** | **.16** | **3.23** | **.00** |  | **.09** | **.03** | **.15** | **3.13** | **.00** |
| 17. Positivity | **.29** | **.18** | **.39** | **5.29** | **.00** |  | **.29** | **.18** | **.39** | **5.26** | **.00** |
| *Personal Vulnerabilities* |  |  |  |  |  |  |  |  |  |  |  |
| 18. Neuroticism | **-.07** | **-.12** | **-.02** | **-2.79** | **.01** |  | -.04 | -.20 | .13 | -.45 | .65 |
| 19. Probability of being infected | .01 | -.05 | .06 | .24 | .81 |  | .09 | -.10 | .28 | .91 | .36 |
| 20. Psychopathy | **-.12** | **-.20** | **-.03** | **-2.59** | **.01** |  | -.08 | -.39 | .23 | -.49 | .63 |
| 21. Economic distress | -.31 | -.70 | .08 | -1.55 | .12 |  | -1.20 | -2.56 | .16 | -1.74 | .08 |
| *Social stressors* |  |  |  |  |  |  |  |  |  |  |  |
| 22. N-infected | .00 | .00 | .00 | -1.18 | .24 |  | .00 | .00 | .00 | -1.33 | .19 |
| 23. Other infected (probability) | .00 | .00 | .00 | 1.06 | .29 |  | .00 | .00 | .00 | 1.12 | .26 |
| *Social Resources* |  |  |  |  |  |  |  |  |  |  |  |
| 24. Trust in known others | .03 | -.13 | .18 | .33 | .74 |  | .03 | -.12 | .18 | .39 | .70 |
| 25. Trust in unknown others | .04 | -.05 | .13 | .89 | .37 |  | .03 | -.06 | .12 | .70 | .49 |
| 26. Trust in Government | -.05 | -.13 | .03 | -1.31 | .19 |  | -.05 | -.13 | .03 | -1.13 | .26 |
| *Interactions* |  |  |  |  |  |  |  |  |  |  |  |
| 27. Indefinite *vs* temporary × Neuroticism |  |  |  |  |  |  | **-.12** | **-.24** | **.01** | **-2.12** | **.03** |
| 28. Indefinite *vs* temporary × Other infected (probability) |  |  |  |  |  |  | -.09 | -.22 | .05 | -1.28 | .20 |
| 29. Indefinite *vs* temporary × Psychopathy |  |  |  |  |  |  | -.19 | -.39 | .01 | -1.83 | .07 |
| 30. Indefinite *vs* temporary × Economic distress |  |  |  |  |  |  | **1.33** | **.41** | **2.24** | **2.85** | **.00** |
| 31. Job insecurity × Neuroticism |  |  |  |  |  |  | .05 | .00 | .09 | -1.95 | .05 |
| 32. Job insecurity × Other infected (probability) |  |  |  |  |  |  | .01 | -.04 | .07 | .47 | .64 |
| 33. Job insecurity × Psychopathy |  |  |  |  |  |  | .08 | -.02 | .17 | 1.64 | .10 |
| 34. Job insecurity × Economic distress |  |  |  |  |  |  | -.29 | -.71 | .13 | -1.35 | .18 |
| *R²* | .25 | | | | |  | .28 | | | | |
| *F* | 7.38*** | | | | |  | 6.27*** | | | | |
| *𝛥R2* |  | | | | |  | .02 | | | | |
| *𝛥F* |  | | | | |  | 2.25** | | | | |

*Note*. LL = lower limit of the confidence interval; UL = upper limit of the confidence interval. Significant predictors are depicted in bold.

**p* < .05; ***p* < .01; ****p* < .001

Table S16. Predictors of Self-Acceptance with Interactions among Social Resources and Job Resources

|  | Self-Acceptance | | | | | | | | | | |
| --- | --- | --- | --- | --- | --- | --- | --- | --- | --- | --- | --- |
|  | Model 1 | | | | |  | Model 2 | | | | |
|  | *B* | LL | UL | *T* | *p* |  | *B* | LL | UL | *T* | *p* |
| Intercept | **4.18** | **3.81** | **4.55** | **22.01** | **.00** |  | **4.18** | **3.81** | **4.55** | **22.20** | **.00** |
| *Covariates* |  |  |  |  |  |  |  |  |  |  |  |
| 1. Sex | -.04 | -.16 | .08 | -.63 | .53 |  | -.05 | -.17 | .07 | -.84 | .40 |
| 2. Age | **-.01** | **-.02** | **.00** | **-2.55** | **.01** |  | **-.01** | **-.02** | **.00** | **-2.64** | **.01** |
| 3. Married *vs* single | **.19** | **.04** | **.34** | **2.55** | **.01** |  | **.18** | **.03** | **.33** | **2.38** | **.02** |
| 4. Divorced *vs* single | -.01 | -.26 | .23 | -.11 | .91 |  | -.02 | -.26 | .23 | -.13 | .89 |
| 5. Public vs private | .07 | -.07 | .21 | .96 | .34 |  | .07 | -.07 | .21 | .97 | .33 |
| 6. Self *vs* public employed | .06 | -.07 | .20 | .91 | .36 |  | .05 | -.09 | .18 | .67 | .50 |
| 7. Work experience | .01 | .00 | .01 | 1.33 | .18 |  | .01 | .00 | .01 | 1.40 | .16 |
| 8. Day | .00 | -.02 | .02 | -.21 | .83 |  | .00 | -.02 | .01 | -.40 | .69 |
| 9. Center *vs* north | .01 | -.19 | .20 | .07 | .94 |  | .03 | -.17 | .22 | .26 | .79 |
| 10. South *vs* north | .07 | -.21 | .35 | .50 | .61 |  | .11 | -.16 | .39 | .82 | .41 |
| 11. Islands *v*s north | -.23 | -.55 | .09 | -1.42 | .16 |  | -.20 | -.52 | .11 | -1.27 | .20 |
| *Job Stressors* |  |  |  |  |  |  |  |  |  |  |  |
| 12. Indefinite *vs* temporary | .06 | -.09 | .21 | .78 | .43 |  | .05 | -.10 | .19 | .62 | .53 |
| 13. Job insecurity | **-.07** | **-.14** | **-.01** | **-2.31** | **.02** |  | **-.07** | **-.13** | **.00** | **-2.05** | **.04** |
| *Job resources* |  |  |  |  |  |  |  |  |  |  |  |
| 14. Trust in organization | -.07 | -.16 | .02 | -1.51 | .13 |  | -.08 | -.17 | .01 | -1.72 | .09 |
| 15. Working from home | .09 | -.04 | .21 | 1.37 | .17 |  | .08 | -.04 | .21 | 1.36 | .17 |
| *Personal Resources* |  |  |  |  |  |  |  |  |  |  |  |
| 16. Conscientiousness | **.07** | **.01** | **.12** | **2.47** | **.01** |  | **.06** | **.01** | **.11** | **2.30** | **.02** |
| 17. Positivity | **.34** | **.25** | **.44** | **7.07** | **.00** |  | **.36** | **.26** | **.45** | **7.37** | **.00** |
| *Personal Vulnerabilities* |  |  |  |  |  |  |  |  |  |  |  |
| 18. Neuroticism | -.03 | -.07 | .02 | -1.29 | .20 |  | -.03 | -.07 | .01 | -1.33 | .19 |
| 19. Probability of being infected | -.05 | -.10 | .00 | -1.92 | .05 |  | -.05 | -.10 | .00 | -1.95 | .05 |
| 20. Psychopathy | **-.10** | **-.18** | **-.02** | **-2.52** | **.01** |  | **-.11** | **-.19** | **-.03** | **-2.73** | **.01** |
| 21. Economic distress | -.03 | -.38 | .32 | -.15 | .88 |  | -.04 | -.38 | .31 | -.20 | .84 |
| *Social stressors* |  |  |  |  |  |  |  |  |  |  |  |
| 22. N-infected | .00 | .00 | .00 | -.34 | .74 |  | .00 | .00 | .00 | -.27 | .78 |
| 23. Other infected (probability) | .00 | .00 | .00 | 1.25 | .21 |  | .00 | .00 | .00 | 1.26 | .21 |
| *Social Resources* |  |  |  |  |  |  |  |  |  |  |  |
| 24. Trust in known others | **.16** | **.02** | **.30** | **2.28** | **.02** |  | **.38** | **.19** | **.57** | **3.90** | **.00** |
| 25. Trust in unknown others | -.02 | -.11 | .06 | -.58 | .56 |  | **-.18** | **-.32** | **-.05** | **-2.65** | **.01** |
| 26. Trust in Government | -.01 | -.08 | .06 | -.18 | .86 |  | -.01 | -.13 | .10 | -.21 | .84 |
| *Interactions* |  |  |  |  |  |  |  |  |  |  |  |
| 27. Trust in organization × Trust in known others |  |  |  |  |  |  | .03 | -.05 | .10 | .76 | .45 |
| 28. Trust in organization × Trust in unknown others |  |  |  |  |  |  | -.06 | -.14 | .02 | -1.47 | .14 |
| 29. Trust in organization × Trust in Government |  |  |  |  |  |  | -.03 | -.10 | .03 | -.98 | .33 |
| 30. Working from home × Trust in known others |  |  |  |  |  |  | **-.33** | **-.53** | **-.13** | **-3.22** | **.00** |
| 31. Working from home × Trust in unknown others |  |  |  |  |  |  | **.26** | **.10** | **.43** | **3.15** | **.00** |
| 31. Working from home × Trust in Government |  |  |  |  |  |  | .02 | -.12 | .17 | .28 | .78 |
| *R²* | .26 | | | | |  | .29 | | | | |
| *F* | 7.64*** | | | | |  | 7.06*** | | | | |
| *𝛥R2* |  | | | | |  | .03 | | | | |
| *𝛥F* |  | | | | |  | 3.65** | | | | |

*Note*. LL = lower limit of the confidence interval; UL = upper limit of the confidence interval. Significant predictors are depicted in bold.

**p* < .05; ***p* < .01; ****p* < .001

Table S17. Predictors of Autonomy with Interactions among Social Resources and Job Resources

|  | Autonomy | | | | | | | | | | |
| --- | --- | --- | --- | --- | --- | --- | --- | --- | --- | --- | --- |
|  | Model 1 | | | | |  | Model 2 | | | | |
|  | *B* | LL | UL | *T* | *p* |  | *B* | LL | UL | *T* | *p* |
| Intercept | **4.32** | **3.88** | **4.77** | **19.06** | **.00** |  | **4.30** | **3.86** | **4.75** | **18.97** | **.00** |
| *Covariates* |  |  |  |  |  |  |  |  |  |  |  |
| 1. Sex | -.10 | -.24 | .04 | -1.39 | .16 |  | -.11 | -.25 | .04 | -1.47 | .14 |
| 2. Age | .00 | -.01 | .02 | .87 | .38 |  | .01 | -.01 | .02 | .95 | .34 |
| 3. Married *vs* single | .03 | -.15 | .21 | .36 | .72 |  | .02 | -.15 | .20 | .26 | .79 |
| 4. Divorced *vs* single | .08 | -.21 | .37 | .54 | .59 |  | .07 | -.22 | .36 | .47 | .64 |
| 5. Public vs private | .05 | -.11 | .22 | .63 | .53 |  | .06 | -.11 | .22 | .64 | .52 |
| 6. Self *vs* public employed | -.05 | -.22 | .11 | -.62 | .54 |  | -.07 | -.23 | .10 | -.81 | .42 |
| 7. Work experience | .00 | -.01 | .01 | .23 | .82 |  | .00 | -.01 | .01 | .10 | .92 |
| 8. Day | .00 | -.03 | .02 | -.25 | .80 |  | .00 | -.03 | .02 | -.38 | .70 |
| 9. Center *vs* north | **-.28** | **-.51** | **-.05** | **-2.37** | **.02** |  | **-.27** | **-.50** | **-.04** | **-2.27** | **.02** |
| 10. South *vs* north | **-.39** | **-.72** | **-.06** | **-2.34** | **.02** |  | **-.38** | **-.71** | **-.05** | **-2.27** | **.02** |
| 11. Islands *v*s north | **-.49** | **-.87** | **-.10** | **-2.50** | **.01** |  | **-.47** | **-.85** | **-.09** | **-2.43** | **.02** |
| *Job Stressors* |  |  |  |  |  |  |  |  |  |  |  |
| 12. Indefinite *vs* temporary | **.22** | **.04** | **.39** | **2.37** | **.02** |  | **.22** | **.04** | **.39** | **2.37** | **.02** |
| 13. Job insecurity | -.05 | -.13 | .03 | -1.30 | .19 |  | -.05 | -.13 | .03 | -1.31 | .19 |
| *Job resources* |  |  |  |  |  |  |  |  |  |  |  |
| 14. Trust in organization | -.04 | -.15 | .07 | -.78 | .44 |  | -.04 | -.15 | .07 | -.71 | .48 |
| 15. Working from home | .12 | -.02 | .27 | 1.66 | .10 |  | .11 | -.03 | .26 | 1.53 | .13 |
| *Personal Resources* |  |  |  |  |  |  |  |  |  |  |  |
| 16. Conscientiousness | **.09** | **.03** | **.15** | **2.81** | **.01** |  | **.10** | **.04** | **.16** | **3.10** | **.00** |
| 17. Positivity | .09 | -.02 | .21 | 1.62 | .11 |  | .10 | -.01 | .22 | 1.74 | .08 |
| *Personal Vulnerabilities* |  |  |  |  |  |  |  |  |  |  |  |
| 18. Neuroticism | **-.10** | **-.15** | **-.05** | **-3.66** | **.00** |  | **-.10** | **-.15** | **-.04** | **-3.52** | **.00** |
| 19. Probability of being infected | .06 | .00 | .12 | 1.87 | .06 |  | .05 | .00 | .11 | 1.82 | .07 |
| 20. Psychopathy | -.03 | -.13 | .06 | -.69 | .49 |  | -.03 | -.12 | .07 | -.57 | .57 |
| 21. Economic distress | -.16 | -.58 | .26 | -.75 | .46 |  | -.14 | -.56 | .28 | -.65 | .52 |
| *Social stressors* |  |  |  |  |  |  |  |  |  |  |  |
| 22. N-infected | .00 | .00 | .00 | -.80 | .43 |  | .00 | .00 | .00 | -.58 | .56 |
| 23. Other infected (probability) | .00 | .00 | .00 | -.92 | .36 |  | .00 | .00 | .00 | -.91 | .36 |
| *Social Resources* |  |  |  |  |  |  |  |  |  |  |  |
| 24. Trust in known others | .05 | -.11 | .22 | .60 | .55 |  | .10 | -.14 | .33 | .82 | .41 |
| 25. Trust in unknown others | .01 | -.08 | .11 | .25 | .80 |  | .03 | -.14 | .19 | .32 | .75 |
| 26. Trust in Government | **-.11** | **-.20** | **-.03** | **-2.61** | **.01** |  | -.02 | -.16 | .12 | -.26 | .79 |
| *Interactions* |  |  |  |  |  |  |  |  |  |  |  |
| 27. Trust in organization × Trust in known others |  |  |  |  |  |  | **.13** | **.04** | **.22** | **2.92** | **.00** |
| 28. Trust in organization × Trust in unknown others |  |  |  |  |  |  | -.03 | -.12 | .07 | -.58 | .56 |
| 29. Trust in organization × Trust in Government |  |  |  |  |  |  | -.04 | -.12 | .04 | -.95 | .34 |
| 30. Working from home × Trust in known others |  |  |  |  |  |  | -.06 | -.30 | .18 | -.46 | .65 |
| 31. Working from home × Trust in unknown others |  |  |  |  |  |  | .00 | -.20 | .19 | -.03 | .98 |
| 31. Working from home × Trust in Government |  |  |  |  |  |  | -.15 | -.32 | .03 | -1.63 | .10 |
| *R²* | .15 | | | | |  | .17 | | | | |
| *F* | 3.77*** | | | | |  | 3.51*** | | | | |
| *𝛥R2* |  | | | | |  | .02 | | | | |
| *𝛥F* |  | | | | |  | 2.17* | | | | |

*Note*. LL = lower limit of the confidence interval; UL = upper limit of the confidence interval. Significant predictors are depicted in bold.

**p* < .05; ***p* < .01; ****p* < .001

**References**

Caprara, G. V., Alessandri, G., Eisenberg, N., Kupfer, A., Steca, P., Caprara, M. G., Yamaguchi, S., Fukuzawa, A., & Abela, J. (2012). The Positivity Scale. *Psychological Assessment*, *24*(3), 701–712. doi: 10.1037/a0026681

Cheung, F., & Lucas, R. E. (2014). Assessing the validity of single-item life satisfaction measures: Results from three large samples. *Quality of Life Research*, *23*(10), 2809-2818. doi: 10.1007/s11136-014-0726-4

Chiorri, C., Bracco, F., Piccinno, T., Modafferi, C., & Battini, V. (2015). Psychometric properties of a revised version of the Ten Item Personality Inventory. *European Journal of Psychological Assessment*, *31*(2), 109-119. doi: 10.1027/1015-5759/a000215

Gonzales, S., & Smith, C. (2017). The Accuracy of Measures of Institutional Trust in Household Surveys: Evidence from the OECD Trust Database. *OECD Statistics Working Paper*, *2017/11*, 1-38. doi: 10.1787/18152031

Gosling, S. D., Rentfrow, P. J., & Swann Jr, W. B. (2003). A very brief measure of the Big-Five personality domains. *Journal of Research in Personality*, *37*(6), 504-528. doi: 10.1016/S0092-6566(03)00046-1

Hellgren, J., Sverke, M., &amp; Isaksson, K. (1999). A two-dimensional approach to job insecurity: Consequences for employee attitudes and well-being. *European Journal of Work and Organizational Psychology*, *8*(2), 179-195. doi: 10.1080/135943299398311

Jonason, P. K., & Webster, G. D. (2010). The dirty dozen: A concise measure of the dark triad. *Psychological Assessment*, *22*(2), 420–432. doi:10.1037/a0019265

McDonald, R. P. (1999). *Test theory: A unified treatment*. Hillsdale, MI: Erlbaum.

Ryff, C. D., & Keyes, C. L. M. (1995). The structure of psychological well-being revisited. Journal of Personality and Social Psychology, 69(4), 719–727. doi: 10.1037/0022-3514.69.4.719

Ryff, C. D., Almeida, D. M., Ayanian, J. S., Carr, D. S., Cleary, P. D., Coe, C., … Williams, D. (2010). *National Survey of Midlife Development in the United States (MIDUS II), 2004-2006: Documentation of psychosocial constructs and composite variables in MIDUS II Project 1*. Ann Arbor, MI: Inter-university Consortium for Political and Social Research.

Schimmenti, A., Jonason, P. K., Passanisi, A., La Marca, L., Di Dio, N., & Gervasi, A. M. (2019). Exploring the dark side of personality: Emotional awareness, empathy, and the Dark Triad traits in an Italian Sample. *Current Psychology*, *38*(1), 100-109. doi: 10.1007/s12144-017-9588-6

Terraciano, A., McCrae, R. R., & Costa, P. T., Jr. (2003). Factorial and construct validity of the Italian Positive and Negative Affect Schedule (PANAS). *European Journal of Psychological Assessment*, *19*(2), 131–141. doi: 10.1027//1015-5759.19.2.131

Trizano-Hermosilla, I., & Alvarado, J. M. (2016). Best alternatives to Cronbach's alpha reliability in realistic conditions: Congeneric and asymmetrical measurements. *Frontiers in Psychology*, *7*, 769-716. doi: 10.3389/fpsyg.2016.00769

Vander Elst, T., De Witte, H., &amp; De Cuyper, N. (2014). The Job Insecurity Scale: A psychometric evaluation across five European countries. *European Journal of Work and Organizational Psychology*, *23*(3), 364-380. doi: 10.1080/1359432X.2012.745989

Watson, D., Clark, L. A., & Tellegen, A. (1988). Development and validation of brief measures of positive and negative affect: The PANAS scales. *Journal of Personality and Social Psychology*, *54*(6), 1063–1070. doi: 10.1037/0022-3514.54.6.1063
