# Supplementary material for: Determinants of workers’ well-being during the COVID-19 outbreak: An exploratory study
Source: Springer Nature journal article supplement (doi:10.1007/s12144-021-02408-w), 2021-10-22
Supplement: MOESM2 [file 12144_2021_2408_MOESM2_ESM.docx]

Supplementary Materials 2

Determinants of Workers’ Well-Being During the COVID-19 Outbreak

An Exploratory Study

Table S1. Predictors of Positive Affect without Covariates

|  | Positive Affect | | | | |
| --- | --- | --- | --- | --- | --- |
|  | Model 0 | | | | |
|  | *B* | LL | UL | *T* | *p* |
| Intercept | **3.48** | **3.31** | **3.65** | **4.68** | **.00** |
| *Job Stressors* |  |  |  |  |  |
| 1. Indefinite *vs* temporary | .07 | -.04 | .19 | 1.31 | .19 |
| 2. Job insecurity | -.02 | -.07 | .03 | -.84 | .40 |
| *Job resources* |  |  |  |  |  |
| 3. Trust in organization | -.01 | -.09 | .06 | -.39 | .69 |
| 4. Working from home | -.03 | -.13 | .07 | -.62 | .53 |
| *Personal Resources* |  |  |  |  |  |
| 5. Conscientiousness | **.10** | **.06** | **.14** | **4.63** | **.00** |
| 6. Positivity | **.36** | **.28** | **.44** | **9.06** | **.00** |
| *Personal Vulnerabilities* |  |  |  |  |  |
| 7. Neuroticism | .02 | -.02 | .06 | 1.11 | .27 |
| 8. Probability of being infected | .00 | -.04 | .04 | -.14 | .89 |
| 9. Psychopathy | .03 | -.03 | .09 | .95 | .34 |
| 10. Economic distress | -.12 | -.40 | .15 | -.86 | .39 |
| *Social Stressors* |  |  |  |  |  |
| 11. N-infected | .00 | .00 | .00 | 1.35 | .18 |
| 23. Other infected (probability) | .00 | .00 | .00 | .15 | .88 |
| *Social Resources* |  |  |  |  |  |
| 12. Trust in known others | .03 | -.08 | .14 | .50 | .62 |
| 13. Trust in unknown others | **.08** | **.01** | **.15** | **2.40** | **.02** |
| 14. Trust in Government | -.04 | -.10 | .01 | -1.49 | .14 |
| *R²* | .27 | | | | |
| *F* | 14.05*** | | | | |

*Note*. LL = lower limit of the confidence interval; UL = upper limit of the confidence interval. Significant predictors are depicted in bold.

**p* < .05; ***p* < .01; ****p* < .001

Table S2. Predictors of Negative Affect without Covariates

|  | Negative Affect | | | | |
| --- | --- | --- | --- | --- | --- |
|  | Model 0 | | | | |
|  | *B* | LL | UL | *T* | *p* |
| Intercept | **2.02** | **1.85** | **2.19** | **23.70** | **.00** |
| *Job Stressors* |  |  |  |  |  |
| 1. Indefinite *vs* temporary | .09 | -.02 | .20 | 1.65 | .10 |
| 2. Job insecurity | **.06** | **.00** | **.11** | **2.14** | **.03** |
| *Job resources* |  |  |  |  |  |
| 3. Trust in organization | .00 | -.07 | .08 | .12 | .90 |
| 4. Working from home | -.01 | -.11 | .09 | -.25 | .80 |
| *Personal Resources* |  |  |  |  |  |
| 5. Conscientiousness | .00 | -.04 | .04 | .06 | .95 |
| 6. Positivity | **-.20** | **-.28** | **-.12** | **-5.01** | **.00** |
| *Personal Vulnerabilities* |  |  |  |  |  |
| 7. Neuroticism | **-.25** | **-.28** | **-.21** | **-13.33** | **.00** |
| 8. Probability of being infected | **.04** | **.00** | **.08** | **2.08** | **.04** |
| 9. Psychopathy | .04 | -.02 | .11 | 1.37 | .17 |
| 10. Economic distress | .23 | -.04 | .51 | 1.68 | .09 |
| *Social Stressors* |  |  |  |  |  |
| 11. N-infected | .00 | .00 | .00 | -.08 | .93 |
| 23. Other infected (probability) | .00 | .00 | .00 | 1.37 | .17 |
| *Social Resources* |  |  |  |  |  |
| 12. Trust in known others | .01 | -.10 | .12 | .16 | .87 |
| 13. Trust in unknown others | .04 | -.03 | .11 | 1.21 | .23 |
| 14. Trust in Government | -.01 | -.07 | .04 | -.48 | .63 |
| *R²* | .43 | | | | |
| *F* | 28.64*** | | | | |

*Note*. LL = lower limit of the confidence interval; UL = upper limit of the confidence interval. Significant predictors are depicted in bold.

**p* < .05; ***p* < .01; ****p* < .001

Table S3. Predictors of Life Satisfaction without Covariates

|  | Life Satisfaction | | | | |
| --- | --- | --- | --- | --- | --- |
|  | Model 0 | | | | |
|  | *B* | LL | UL | *T* | *p* |
| Intercept | **4.19** | **3.94** | **4.43** | **33.93** | **.00** |
| *Job Stressors* |  |  |  |  |  |
| 1. Indefinite *vs* temporary | -.09 | -.25 | .07 | -1.12 | .26 |
| 2. Job insecurity | -.06 | -.13 | .01 | -1.57 | .12 |
| *Job resources* |  |  |  |  |  |
| 3. Trust in organization | .01 | -.10 | .11 | .10 | .92 |
| 4. Working from home | .06 | -.09 | .20 | .75 | .45 |
| *Personal Resources* |  |  |  |  |  |
| 5. Conscientiousness | .02 | -.05 | .08 | .53 | .60 |
| 6. Positivity | **.78** | **.67** | **.89** | **13.68** | **.00** |
| *Personal Vulnerabilities* |  |  |  |  |  |
| 7. Neuroticism | .04 | -.01 | .10 | 1.65 | .10 |
| 8. Probability of being infected | .01 | -.04 | .07 | .50 | .62 |
| 9. Psychopathy | .00 | -.09 | .09 | -.08 | .94 |
| 10. Economic distress | .10 | -.29 | .50 | .51 | .61 |
| *Social Stressors* |  |  |  |  |  |
| 11. N-infected | .00 | .00 | .00 | .09 | .93 |
| 23. Other infected (probability) | .00 | .00 | .00 | 1.20 | .23 |
| *Social Resources* |  |  |  |  |  |
| 12. Trust in known others | .16 | .00 | .33 | 1.94 | .05 |
| 13. Trust in unknown others | .03 | -.06 | .13 | .63 | .53 |
| 14. Trust in Government | -.05 | -.14 | .03 | -1.28 | .20 |
| *R²* | .40 | | | | |
| *F* | 25.22*** | | | | |

*Note*. LL = lower limit of the confidence interval; UL = upper limit of the confidence interval. Significant predictors are depicted in bold.

**p* < .05; ***p* < .01; ****p* < .001

Table S4. Predictors of Purpose in Life without Covariates

|  | Purpose in Life | | | | |
| --- | --- | --- | --- | --- | --- |
|  | Model 0 | | | | |
|  | *B* | LL | UL | *T* | *p* |
| Intercept | **4.28** | **4.00** | **4.57** | **29.83** | **.00** |
| *Job Stressors* |  |  |  |  |  |
| 1. Indefinite *vs* temporary | **.21** | **.02** | **.39** | **2.18** | **.03** |
| 2. Job insecurity | -.02 | -.10 | .07 | -.45 | .66 |
| *Job resources* |  |  |  |  |  |
| 3. Trust in organization | -.06 | -.19 | .06 | -.98 | .33 |
| 4. Working from home | .09 | -.07 | .26 | 1.11 | .27 |
| *Personal Resources* |  |  |  |  |  |
| 5. Conscientiousness | **.14** | **.06** | **.21** | **3.72** | **.00** |
| 6. Positivity | .00 | -.14 | .13 | -.07 | .94 |
| *Personal Vulnerabilities* |  |  |  |  |  |
| 7. Neuroticism | -.03 | -.09 | .04 | -.81 | .42 |
| 8. Probability of being infected | **-.10** | **-.17** | **-.04** | **-2.97** | **.00** |
| 9. Psychopathy | .04 | -.06 | .15 | .79 | .43 |
| 10. Economic distress | -.29 | -.75 | .17 | -1.23 | .22 |
| *Social Stressors* |  |  |  |  |  |
| 11. N-infected | .00 | .00 | .00 | -.37 | .71 |
| 23. Other infected (probability) | .00 | .00 | .00 | .76 | .44 |
| *Social Resources* |  |  |  |  |  |
| 12. Trust in known others | -.05 | -.24 | .14 | -.51 | .61 |
| 13. Trust in unknown others | .02 | -.09 | .13 | .29 | .77 |
| 14. Trust in Government | -.09 | -.18 | .01 | -1.75 | .08 |
| *R²* | .06 | | | | |
| *F* | 2.58*** | | | | |

*Note*. LL = lower limit of the confidence interval; UL = upper limit of the confidence interval. Significant predictors are depicted in bold.

**p* < .05; ***p* < .01; ****p* < .001

Table S5. Predictors of Self-Acceptance without Covariates

|  | Self-Acceptance | | | | |
| --- | --- | --- | --- | --- | --- |
|  | Model 0 | | | | |
|  | *B* | LL | UL | *T* | *p* |
| Intercept | **4.31** | **4.10** | **4.51** | **41.55** | **.00** |
| *Job Stressors* |  |  |  |  |  |
| 1. Indefinite *vs* temporary | .08 | -.05 | .22 | 1.21 | .23 |
| 2. Job insecurity | **-.07** | **-.14** | **-.01** | **-2.37** | **.02** |
| *Job resources* |  |  |  |  |  |
| 3. Trust in organization | -.06 | -.15 | .03 | -1.37 | .17 |
| 4. Working from home | .06 | -.06 | .18 | .99 | .32 |
| *Personal Resources* |  |  |  |  |  |
| 5. Conscientiousness | **.08** | **.02** | **.13** | **2.88** | **.00** |
| 6. Positivity | **.35** | **.26** | **.44** | **7.27** | **.00** |
| *Personal Vulnerabilities* |  |  |  |  |  |
| 7. Neuroticism | .03 | -.01 | .08 | 1.42 | .16 |
| 8. Probability of being infected | -.05 | -.10 | .00 | -1.91 | .06 |
| 9. Psychopathy | **-.08** | **-.16** | **-.01** | **-2.13** | **.03** |
| 10. Economic distress | .09 | -.25 | .42 | .52 | .60 |
| *Social Stressors* |  |  |  |  |  |
| 11. N-infected | .00 | .00 | .00 | -.13 | .90 |
| 23. Other infected (probability) | .00 | .00 | .00 | 1.60 | .11 |
| *Social Resources* |  |  |  |  |  |
| 12. Trust in known others | **.16** | **.02** | **.29** | **2.23** | **.03** |
| 13. Trust in unknown others | -.03 | -.11 | .05 | -.78 | .44 |
| 14. Trust in Government | -.01 | -.08 | .06 | -.24 | .81 |
| *R²* | .24 | | | | |
| *F* | 11.88*** | | | | |

*Note*. LL = lower limit of the confidence interval; UL = upper limit of the confidence interval. Significant predictors are depicted in bold.

**p* < .05; ***p* < .01; ****p* < .001

Table S6. Predictors of Positive Relations without Covariates

|  | Positive Relations | | | | |
| --- | --- | --- | --- | --- | --- |
|  | Model 0 | | | | |
|  | *B* | LL | UL | *T* | *p* |
| Intercept | **4.65** | **4.37** | **4.93** | **32.71** | **.00** |
| *Job Stressors* |  |  |  |  |  |
| 1. Indefinite *vs* temporary | **.19** | **.01** | **.38** | **2.03** | **.04** |
| 2. Job insecurity | .00 | -.09 | .08 | -.05 | .96 |
| *Job resources* |  |  |  |  |  |
| 3. Trust in organization | **-.16** | **-.28** | **-.04** | **-2.56** | **.01** |
| 4. Working from home | -.06 | -.22 | .11 | -.66 | .51 |
| *Personal Resources* |  |  |  |  |  |
| 5. Conscientiousness | **.11** | **.04** | **.18** | **2.98** | **.00** |
| 6. Positivity | **.25** | **.12** | **.38** | **3.78** | **.00** |
| *Personal Vulnerabilities* |  |  |  |  |  |
| 7. Neuroticism | **.11** | **.05** | **.17** | **3.56** | **.00** |
| 8. Probability of being infected | .02 | -.04 | .09 | .69 | .49 |
| 9. Psychopathy | **-.28** | **-.39** | **-.18** | **-5.37** | **.00** |
| 10. Economic distress | .22 | -.23 | .68 | .96 | .34 |
| *Social Stressors* |  |  |  |  |  |
| 11. N-infected | .00 | .00 | .00 | -.78 | .44 |
| 23. Other infected (probability) | .00 | .00 | .00 | -.71 | .48 |
| *Social Resources* |  |  |  |  |  |
| 12. Trust in known others | **.46** | **.27** | **.64** | **4.73** | **.00** |
| 13. Trust in unknown others | -.01 | -.12 | .10 | -.24 | .81 |
| 14. Trust in Government | .01 | -.09 | .10 | .14 | .89 |
| *R²* | .25 | | | | |
| *F* | 12.55*** | | | | |

*Note*. LL = lower limit of the confidence interval; UL = upper limit of the confidence interval. Significant predictors are depicted in bold.

**p* < .05; ***p* < .01; ****p* < .001

Table S7. Predictors of Personal Growth without Covariates

|  | Personal Growth | | | | |
| --- | --- | --- | --- | --- | --- |
|  | Model 0 | | | | |
|  | *B* | LL | UL | *T* | *p* |
| Intercept | **3.95** | **3.71** | **4.18** | **32.63** | **.00** |
| *Job Stressors* |  |  |  |  |  |
| 1. Indefinite *vs* temporary | **.47** | **.31** | **.63** | **5.85** | **.00** |
| 2. Job insecurity | -.06 | -.13 | .01 | -1.63 | .10 |
| *Job resources* |  |  |  |  |  |
| 3. Trust in organization | -.06 | -.16 | .04 | -1.12 | .26 |
| 4. Working from home | .09 | -.06 | .23 | 1.19 | .24 |
| *Personal Resources* |  |  |  |  |  |
| 5. Conscientiousness | **.09** | **.03** | **.15** | **2.85** | **.00** |
| 6. Positivity | **.25** | **.14** | **.36** | **4.48** | **.00** |
| *Personal Vulnerabilities* |  |  |  |  |  |
| 7. Neuroticism | **.08** | **.03** | **.13** | **2.94** | **.00** |
| 8. Probability of being infected | -.01 | -.06 | .05 | -.25 | .80 |
| 9. Psychopathy | -.04 | -.12 | .05 | -.80 | .43 |
| 10. Economic distress | -.20 | -.59 | .19 | -1.01 | .31 |
| *Social Stressors* |  |  |  |  |  |
| 11. N-infected | .00 | .00 | .00 | -.17 | .87 |
| 23. Other infected (probability) | .00 | .00 | .00 | 1.04 | .30 |
| *Social Resources* |  |  |  |  |  |
| 12. Trust in known others | -.03 | -.19 | .13 | -.32 | .75 |
| 13. Trust in unknown others | .01 | -.08 | .11 | .28 | .78 |
| 14. Trust in Government | -.07 | -.15 | .02 | -1.59 | .11 |
| *R²* | .16 | | | | |
| *F* | 7.53*** | | | | |

*Note*. LL = lower limit of the confidence interval; UL = upper limit of the confidence interval. Significant predictors are depicted in bold.

**p* < .05; ***p* < .01; ****p* < .001

Table S8. Predictors of Environmental Mastery without Covariates

|  | Environmental Mastery | | | | |
| --- | --- | --- | --- | --- | --- |
|  | Model 0 | | | | |
|  | *B* | LL | UL | *T* | *p* |
| Intercept | **4.04** | **3.82** | **4.26** | **36.28** | **.00** |
| *Job Stressors* |  |  |  |  |  |
| 1. Indefinite *vs* temporary | .12 | -.02 | .27 | 1.69 | .09 |
| 2. Job insecurity | **-.09** | **-.15** | **-.02** | **-2.61** | **.01** |
| *Job resources* |  |  |  |  |  |
| 3. Trust in organization | .08 | -.01 | .18 | 1.71 | .09 |
| 4. Working from home | .06 | -.07 | .19 | .96 | .34 |
| *Personal Resources* |  |  |  |  |  |
| 5. Conscientiousness | **.14** | **.08** | **.20** | **4.90** | **.00** |
| 6. Positivity | **.24** | **.14** | **.34** | **4.59** | **.00** |
| *Personal Vulnerabilities* |  |  |  |  |  |
| 7. Neuroticism | **.14** | **.09** | **.19** | **5.86** | **.00** |
| 8. Probability of being infected | -.01 | -.06 | .04 | -.40 | .69 |
| 9. Psychopathy | -.02 | -.11 | .06 | -.59 | .56 |
| 10. Economic distress | -.13 | -.49 | .23 | -.70 | .48 |
| *Social Stressors* |  |  |  |  |  |
| 11. N-infected | .00 | .00 | .00 | 1.06 | .29 |
| 23. Other infected (probability) | .00 | .00 | .00 | .51 | .61 |
| *Social Resources* |  |  |  |  |  |
| 12. Trust in known others | -.14 | -.29 | .01 | -1.90 | .06 |
| 13. Trust in unknown others | .03 | -.05 | .12 | .71 | .47 |
| 14. Trust in Government | -.02 | -.09 | .06 | -.46 | .65 |
| *R²* | .26 | | | | |
| *F* | 13.27*** | | | | |

*Note*. LL = lower limit of the confidence interval; UL = upper limit of the confidence interval. Significant predictors are depicted in bold.

**p* < .05; ***p* < .01; ****p* < .001

Table S9. Predictors of Autonomy without Covariates

|  | Autonomy | | | | |
| --- | --- | --- | --- | --- | --- |
|  | Model 0 | | | | |
|  | *B* | LL | UL | *T* | *p* |
| Intercept | **4.10** | **3.86** | **4.34** | **33.15** | **.00** |
| *Job Stressors* |  |  |  |  |  |
| 1. Indefinite *vs* temporary | .14 | -.02 | .30 | 1.67 | .10 |
| 2. Job insecurity | -.06 | -.14 | .01 | -1.67 | .10 |
| *Job resources* |  |  |  |  |  |
| 3. Trust in organization | -.06 | -.17 | .04 | -1.18 | .24 |
| 4. Working from home | .08 | -.06 | .23 | 1.12 | .26 |
| *Personal Resources* |  |  |  |  |  |
| 5. Conscientiousness | **.09** | **.03** | **.15** | **2.75** | **.01** |
| 6. Positivity | .09 | -.02 | .21 | 1.63 | .10 |
| *Personal Vulnerabilities* |  |  |  |  |  |
| 7. Neuroticism | **.11** | **.06** | **.17** | **4.22** | **.00** |
| 8. Probability of being infected | .05 | -.01 | .11 | 1.76 | .08 |
| 9. Psychopathy | -.04 | -.13 | .05 | -.94 | .35 |
| 10. Economic distress | -.26 | -.65 | .14 | -1.26 | .21 |
| *Social Stressors* |  |  |  |  |  |
| 11. N-infected | .00 | .00 | .00 | .72 | .47 |
| 23. Other infected (probability) | .00 | .00 | .00 | -1.01 | .31 |
| *Social Resources* |  |  |  |  |  |
| 12. Trust in known others | .06 | -.10 | .23 | .74 | .46 |
| 13. Trust in unknown others | .03 | -.07 | .13 | .62 | .54 |
| 14. Trust in Government | **-.12** | **-.20** | **-.03** | **-2.69** | **.01** |
| *R²* | .12 | | | | |
| *F* | 5.39*** | | | | |

*Note*. LL = lower limit of the confidence interval; UL = upper limit of the confidence interval. Significant predictors are depicted in bold.

**p* < .05; ***p* < .01; ****p* < .001
